# Supplementary material for: New insight into the structure of thiolated gold clusters: a structural prediction of the Au187(SR)68 cluster
Source: Royal Society of Chemistry journal article supplement (doi:10.1039/c4cp05695g), 2015-01-01
Supplement: c4cp05695g1.pdf [file c4cp05695g1.pdf]

## SUPPORTING INFORMATION

### **New insight on the structure of thiolated gold clusters. A structural prediction of the $\text{Au}_{187}(\text{SR})_{68}$ cluster**

**Alfredo Tlahuice-Flores**

CICFIM-Facultad de Ciencias Físico-Matemáticas, Universidad Autónoma de Nuevo León, San Nicolás de los Garza, NL 66450, México

Email: tlahuicef@gmail.com

Part I. Comparison of simulated XRD patterns of thiolated  $\text{Au}_{25}$ , and  $\text{Au}_{38}$  clusters.

Part II. Bond distances of the optimized  $\text{Au}_{187}(\text{SH})_{68}$  model.

## PART I

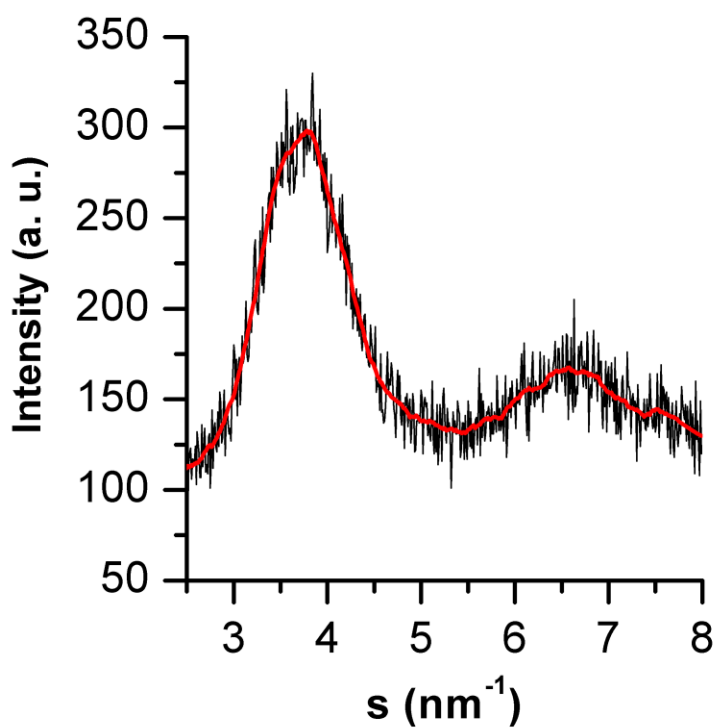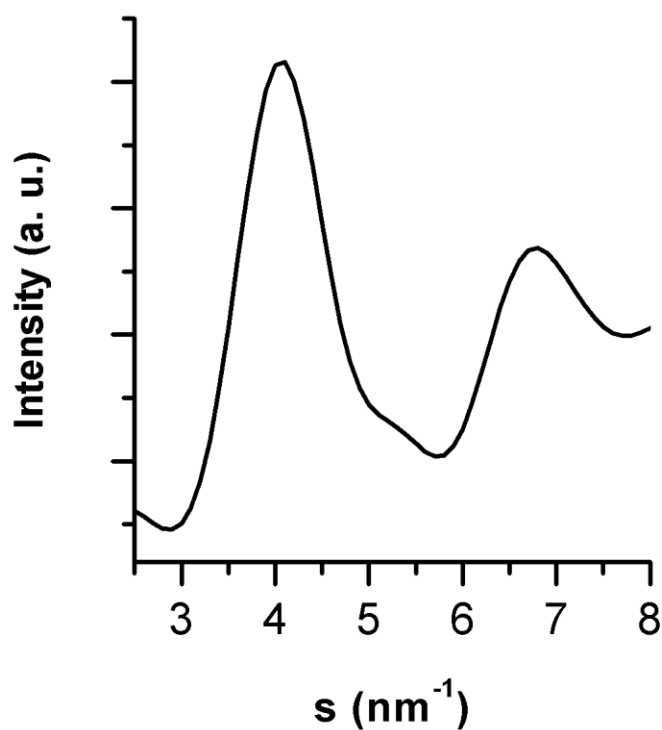

**Figure S1.** Comparison of the experimental (upper panel) and simulated curve of Au<sub>25</sub>(SR)<sub>18</sub> cluster. Red curve represents the smoothed one of the experimental XRD pattern. Theoretical curve corresponds with the structure reported in ref. 19.

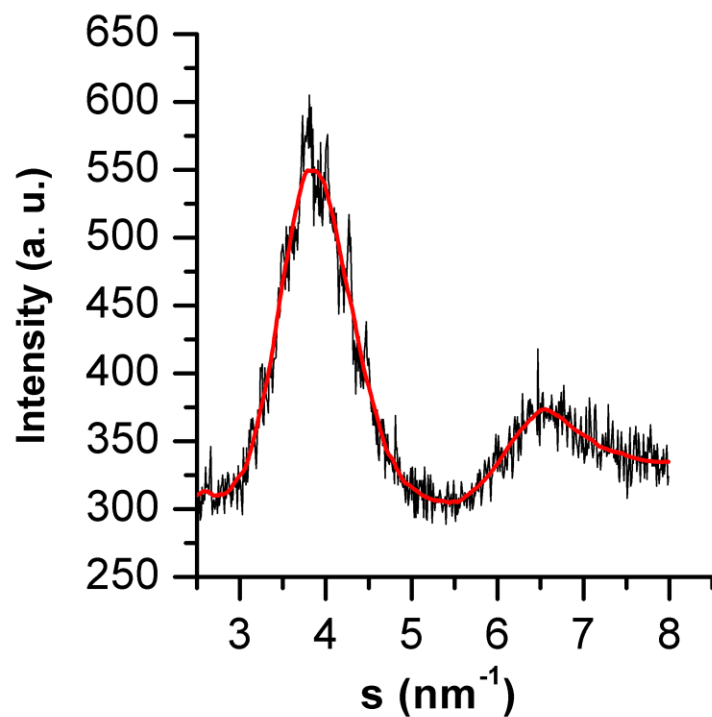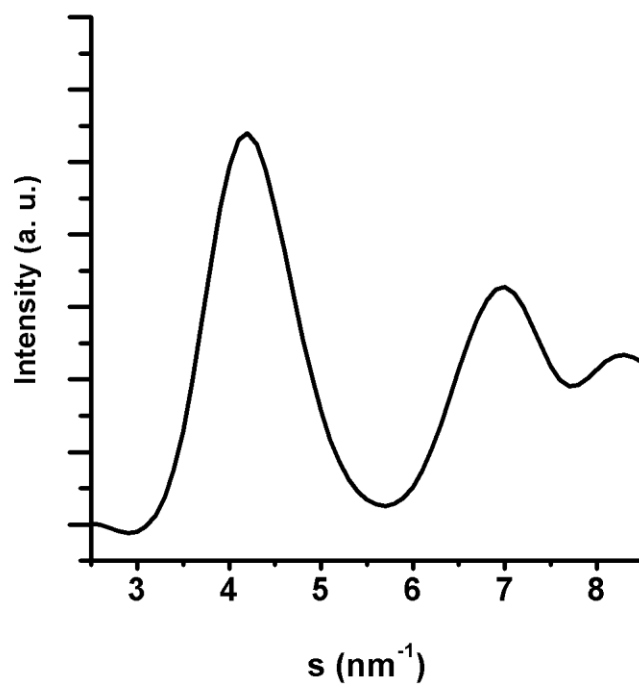

**Figure S2.** Comparison of the experimental (upper panel) and simulated curve of Au<sub>38</sub>(SR)<sub>24</sub> cluster. Red curve represents the smoothed one of the experimental XRD pattern. Theoretical curve corresponds with the structure reported in ref. 20

## PART II

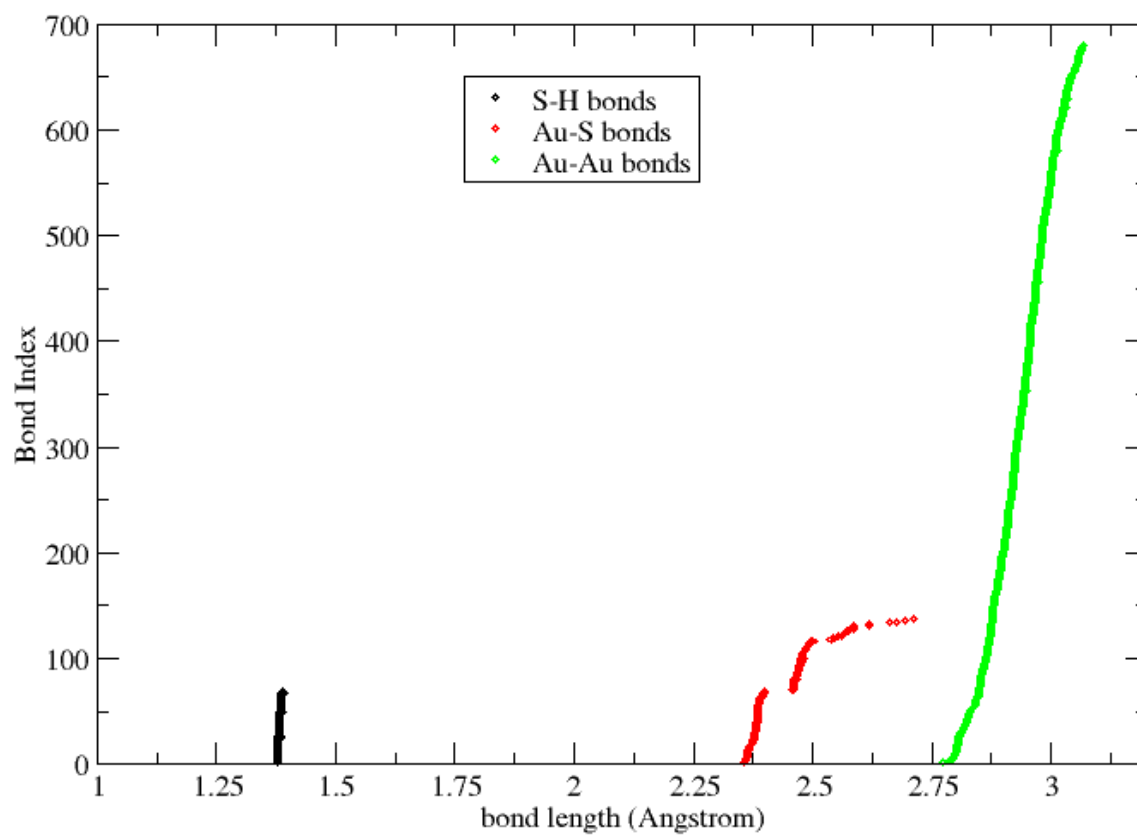

**Figure S3.** Bond length of relaxed Au<sub>187</sub>(SH)<sub>68</sub> cluster.
